# Supplementary material for: Muscadine Grape Skin Extract (MPX) in Men with Biochemically Recurrent Prostate Cancer: A Randomized, Multicenter, Placebo-Controlled Clinical Trial
Source: Oxford University Press journal article supplement (doi:10.1158/1078-0432.ccr-17-1100), 2017-11-07
Supplement: 10780432ccr171100-sup-182034_2_supp_4331536_jxtjtm.docx [file 10780432ccr171100-sup-182034_2_supp_4331536_jxtjtm.docx]

S4. Supplementary Results: Prior ADT Treatment

Prior ADT treatment was not associated with greater increases in PSADT in any treatment arm. (**Supplementary Figure S4.1**)

Supplementary Table S4.1 PSADT Change from Baseline, in Months, by *SOD2* Genotype and Treatment Arm in ADT Naïve Patients


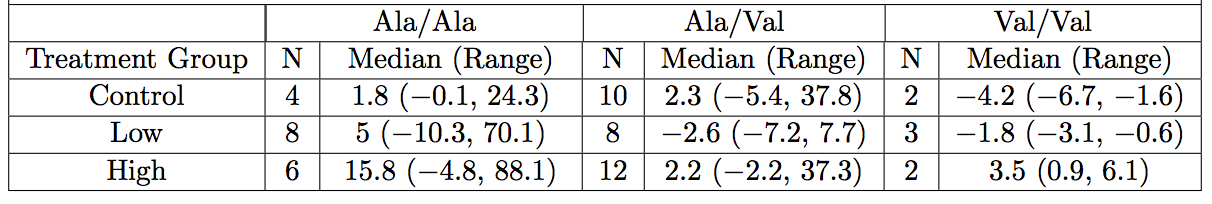


Supplementary Table S4.2 PSADT Change from Baseline, in Months, by *SOD2* Genotype and Treatment Arm in Patients Who had Prior ADT Treatment


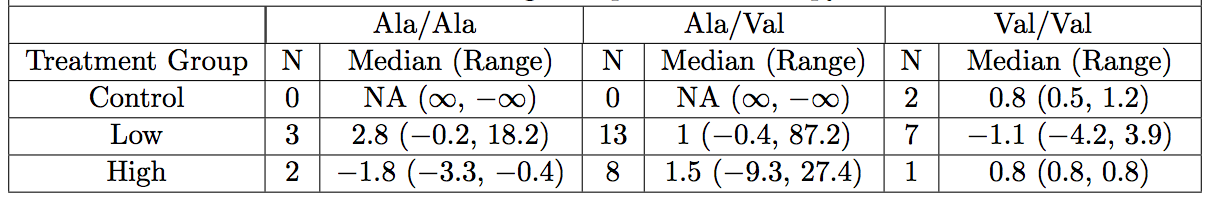


Figure Legend

Supplementary Figure S4.1 PSADT Change from Baseline in Months by MPX Treatment Group and Prior ADT Treatment
